# Supplementary material
Source: PubMed Central journal article supplement (PMC9062113)
Supplement: 00652-2021.SUPPLEMENT.pdf [file 00652-2021.SUPPLEMENT.pdf]

## Supplemental information

Heparan sulfate mimetic fucoidan restores the endothelial glycocalyx and protects against dysfunction induced by serum of COVID-19 patients on ICU

Lushun Yuan<sup>1</sup>, Shuzhen Cheng<sup>2</sup>, Wendy M.P.J. Sol<sup>1</sup>, Anouk I.M. van der Velden<sup>1</sup>, Hans Vink<sup>3,4</sup>, Ton J. Rabelink<sup>1</sup>, Bernard M. van den Berg<sup>1</sup>, in collaboration with the BEAT-COVID study group<sup>5</sup>

The Einthoven Laboratory for Vascular and Regenerative Medicine, department of Internal Medicine, Nephrology<sup>1</sup> and Thrombosis and Hemostasis<sup>2</sup>, Leiden University Medical Center, Leiden, the Netherlands.

<sup>3</sup>Department of Physiology, Cardiovascular Research Institute Maastricht, Maastricht, the Netherlands

<sup>4</sup>MicroVascular Health Solutions LLC, Alpine, Utah, USA

<sup>5</sup>BEAT-COVID study group (in alphabetical order, IR): M.S. Arbous<sup>1</sup>, B.M. van den Berg<sup>2</sup>, S. Cannegieter<sup>3</sup>, C.M. Cobbaert<sup>4</sup>, A. van der Does<sup>5</sup>, J.J.M. van Dongen<sup>6</sup>, J. Eikenboom<sup>7</sup>, M.C.M. Feltkamp<sup>8</sup>, A. Geluk<sup>9</sup>, J.J. Goeman<sup>10</sup>, M. Giera<sup>11</sup>, T. Hankemeier<sup>12</sup>, M.H.M. Heemskerk<sup>13</sup>, P.S. Hiemstra<sup>5</sup>, C.H. Hokke<sup>14</sup>, J.J. Janse<sup>14</sup>, S.P. Jochems<sup>14</sup>, S.A. Joosten<sup>9</sup>, M. Kikkert<sup>8</sup>, L. Lamont<sup>12</sup>, J. Manniën<sup>10</sup>, T.H.M. Ottenhoff<sup>9</sup>, M.R. del Prado<sup>1</sup>, N. Queralt Rosinach<sup>15</sup>, M. Roestenberg<sup>14</sup>, M. Roos<sup>15</sup>, A.H.E. Roukens<sup>9</sup>, H.H. Smits<sup>14</sup>, E.J. Snijder<sup>8</sup>, F.J.T. Staal<sup>6</sup>, L.A. Trouw<sup>6</sup>, R. Tsonaka<sup>10</sup>, A. Verhoeven<sup>11</sup>, L.G. Visser<sup>9</sup>, J.J.C. de Vries<sup>8</sup>, D.J. van Westerloo<sup>1</sup>, J. Wigbers<sup>1</sup>, H.J. van der Wijk<sup>10</sup>, R.C. van Wissen<sup>4</sup>, M. Wuhrer<sup>11</sup>, M. Yazdanbakhsh<sup>14</sup>, M. Zlei<sup>6</sup>

Leiden University Medical Center, Leiden, the Netherlands: <sup>1</sup>Dept. of Intensive Care; Dept. of Internal Medicine, Nephrology; <sup>3</sup>Dept. of Clinical Epidemiology; <sup>4</sup>Dept. of Clinical Chemistry; <sup>5</sup>Dept. of Pulmonology; <sup>6</sup>Dept. of Immunology; <sup>7</sup>Dept. of Internal Medicine, Thrombosis and Haemostasis; <sup>8</sup>Dept. of Medical Microbiology; <sup>9</sup>Dept. of Infectious Diseases; <sup>10</sup>Dept. of Biomedical Data Sciences; <sup>11</sup>Center for Proteomics and Metabolomics; <sup>12</sup>Dept. of Analytical biosciences, Leiden Academic Centre for Drug Research; <sup>13</sup>Dept. of Haematology; <sup>14</sup>Dept. of Parasitology; <sup>15</sup>Dept. of Human Genetics

## **Supplementary Material and methods**

### **Circulating markers of endothelial dysfunction and glycocalyx shedding**

Plasma samples were thawed at room temperature. All plasma analytes were measured with immunoassays in duplicate according to manufacturer's recommendation. Samples were diluted in diluent reagent according to manufacturer's protocol. Analytes measured include angiotensin 2 (Ang-2, DANG20, R&D Systems, Abingdon, UK), soluble thrombomodulin (sTM, M850720096, Diaclone, Besançon, France) and soluble syndecan-1 (sSDC1, DY2780, R&D Systems). For angiotensin 2 and soluble thrombomodulin, commercial control samples were included in each plate to confirm the amount of protein level.

### ***In Vitro* Culture Experiments**

Primary human pulmonary microvascular endothelial cells (HPMECs) were purchased from PromoCell (Lot no. 455Z003, Heidelberg, Germany) and primary human glomerular microvascular ECs (GEnCs) were purchased from Cell Systems (ACBRI-128; Kirkland, WA, USA) and were both cultured in endothelial growth medium (basal medium MV, C-22220, PromoCell) supplemented with C-39220 (PromoCell) and 1% antibiotics (penicillin/streptomycin, 15070063, Gibco, Paisley, UK) at 37°C and 5% CO<sub>2</sub>. For each cell line, passage 5 were used for experiments.

### **Endothelial barrier function assay**

Endothelial barrier function analysis was performed with impedance-based cell monitoring using the electric cell-substrate impedance sensing system (ECIS Zθ, Applied Biophysics, New York, USA). ECIS plates (96W20idf PET, Applied Biophysics) were pre-treated with 10 mM L-cysteine and coated with 1% gelatine (for GEnCs) or without 1% gelatine (for HPMECs). HPMECs (p5) were seeded at a concentration of  $4.5 \times 10^5$  cells/well and for GEnCs (p5), the concentration was  $3 \times 10^5$  cells/well. Medium was refreshed after 24 hours. Initial baseline resistance was measured for 2 hours before endothelial cells were seeded into the plate. Multiple frequency/time mode was used for the real-time assessment of the barrier function. Additionally, the real-time resistance was generated every 350 seconds. Once the stable monolayer was formed, endothelial cells were incubated with 10% serum (healthy (n=12), COVID-19 non-ICU (n=8) and ICU (n=26)) and measured for 20 hours. Afterwards, modelling data R<sub>b</sub> which represents barrier function could be generated.

In additional experiments, HPMECs were exposed to 10% healthy serum (n=12), COVID-19 ICU serum (n=26) with or without fucoidan (10 µg/mL, gift from MicroVascular Health Solutions LLC, Alpine, UT, USA) and measured on the ECIS machine for 20 hours. The natural fucoidan provided (Iso 9000 and GMP certified from Omniparm, S.A.S, Chambéry, France) was extracted from *Laminaria japonica* as a powder of 91.20% purity and further tested, for instance, on the presence of heavy metals (arsenic, lead, cadmium, mercury) or microbiology parameters (European Pharmacopoeia VIII, Ed 2,6,12: total plate count, yeast, mold, *E. coli*, *Salmonella spp.*). A 50x times stock solution was prepared by dissolving the appropriate amount of powder in milliQ water and passed through a 0.22µm filter before use. Cell culturing supernatant and 10% serum in no FCS medium were collected and centrifuged for VWF ELISA assay.

### **RNA isolation and RT-PCR**

Cells were harvested in TRIzol and total RNA was isolated using RNeasy Mini Kit (74106, Qiagen, Venlo, The Netherlands) according to its protocol. cDNA synthesis was transcribed using GoScript™ Reverse Transcriptase kit (A5001, Promega, Leiden, The Netherlands). RT-PCR analysis was conducted using SYBR Select Master Mix (4472908, Applied Biosystems, Landsmeer, The Netherlands) and specific primers as indicated in supplementary table s2. Gene expression was normalized to GAPDH of 5 separate experiments.

### **Immunoblotting analysis**

Western blots were performed from protein extracts of HPMECs. Cells were washed once with cold PBS and lysed in lysis buffer mentioned in our previous study[1]. After centrifugation of the samples at 12,000 rpm for 15 min at 4°C, supernatant was collected and protein concentration was measured using the Pierce BCA Protein Assay Kit (23255, ThermoFisher, Landsmeer, The Netherlands). Equal amounts of protein were denatured using DTT and incubated at 95°C for 10 minutes. 10% Mini-PROTEAN® TGX™ Protein Gels (4561031, Bio-Rad Laboratories, Veenendaal, The Netherlands) were used for protein size separation and proteins were transferred to PVDF membranes (1704156, Bio-Rad) using the Trans-Blot Turbo system. Afterwards, the membrane was blocked in 5% milk in PBST at room temperature for 1 hour. Primary antibody rabbit anti-human ICAM1 (4915, Cell Signalling Technology), rabbit anti-human total NF-κB p65 (8242, Cell Signalling Technology), rabbit anti-human phosphor-NF-κB p65 (Ser536) (3033, Cell Signalling Technology) and mouse anti-human

GAPDH (MA5-15738, ThermoFisher) were incubated overnight at 4°C. Incubation with a secondary HRP-conjugated antibody (P0447 and P0448, Dako, Amstelveen, The Netherlands) and visualization using Western Lightning Plus-ECL, Enhanced Chemiluminescence Substrate (NEL103001EA, PerkinElmer, Groningen, The Netherlands). Intensity of the bands were analysed using ImageJ software. Relative intensity was determined by levels of GAPDH.

### **Immunofluorescence of cultured cells**

HPMECs (p5) were cultured in 8-well chamber slides (ibiTreat,  $\mu$ -Slide 8 Well). Medium was refreshed after 24 hours to remove non-attached cells. When HPMECs formed a confluent monolayer after 48 hours, they were incubated with 10% pooled serum (healthy control (pooled n = 12), non-ICU (pooled n = 8) and ICU (pooled n = 26) in no FCS medium for 24 hours. Next, cells were fixed with 4% PFA and 0.2% Triton-X100 in HBSS or 4% PFA in HBSS (for HS and LEA staining) for 10 minutes at room temperature, washed twice with 1% BSA in HBSS, and blocked with 3% goat serum in HBSS for 1 hour at room temperature. Then, cells were incubated with FITC labelled *Lycopersicon esculentum* (LEA-FITC, L0401, Sigma, Houten, The Netherlands), primary monoclonal Mouse Anti-Human VE cadherin (55-7H1; BD Biosciences), monoclonal Mouse Anti-heparan sulfate (10E4, 370255-1, AMSBIO, Abingdon, UK) and monoclonal Mouse Anti-TM (MA5-11454, ThermoFisher) at 4°C overnight, followed by an appropriate secondary antibody and phalloidin-TRITC (VE-cadherin samples) for 1 hour, all in blocking buffer. Cells were subsequently washed and incubated with Hoechst 33528 (1/1,000) for 10 minutes at room temperature.

Cells were imaged using a LEICA SP8 WLL confocal microscope (Leica, Rijswijk, the Netherlands) to create image stacks. Fluorescent images were analysed using Image J software. To quantify the total area of VE-cadherin staining, all VE-cadherin derived fluorescent signal below a threshold was included in a mask. The value for the threshold intensity was kept the same for each field and then the positive area of VE-cadherin is quantified as adhesion junction area. 10 fields per experiment were imaged for every condition for further analysis. To quantify the glycocalyx coverage, endothelial nuclear region was selected and the thickness of the glycocalyx was quantified by calculating the distance from the half-maximum signal of the nuclear staining at the luminal side to the half-maximum signal at the luminal end of the staining in the z-direction. Fluorescence intensity was calculated based on the average fluorescence intensity from the half-maximum signal of the nuclear staining at the luminal side to the half-maximum signal at the luminal end of the staining in the z-

direction. Surface amount of glycocalyx was presented as mean fluorescence intensity (Mean FL) times luminal thickness.

### **FX activation by extrinsic tenase complex (TF-FVIIa)**

Primary human pulmonary microvascular endothelial cells at passage 5 were seeded into 96 wells plates at a concentration of  $2.5 \times 10^4$  cells/well. Medium was refreshed after 24 hours and after 48 hours, HPMECs were incubated with 10% control (n=12), COVID-19 non-ICU (n=8) and ICU serum (n=26, with or without presence of fucoidan) in no FCS medium for 24 hours. Cell culture supernatants were collected and centrifuged for ELISA assays. Afterwards, cells were washed once with prewarmed HBSS with  $\text{Ca}^{2+}$ . Factor VIIa (80  $\mu\text{L}$ , 10 nM, HCVIIA-0031, Haematologic Technologies, Huissen, The Netherlands) was added and incubated for 15 minutes at  $37^\circ\text{C}$  and  $5\% \text{CO}_2$ . Then the reaction system was initiated by adding factor X (80  $\mu\text{L}$ , 400 nM, HCX-0050, Haematologic Technologies). The plate was kept in incubator to keep the reaction continuous and 2 time points were selected (1 hour and 2 hours) to detect the production of active factor X. Aliquots were taken and quenched in HBS supplemented with 50mM EDTA to stop the reaction. The amidolytic activity of each sample was determined by SpecXa conversion (250  $\mu\text{M}$ ), measuring the absorbance at 405 nm and the initial rates of chromogenic substrate hydrolysis were converted to nanomolar of product by reference to a corresponding FXa standard curve.

### **Thrombin generation Assay**

Primary human pulmonary microvascular endothelial cells at passage 5 were seeded into 96 wells plates at a concentration of  $2.5 \times 10^4$  cells/well. Medium was refreshed after 24 hours and after 48 hours, HPMECs were incubated with 10% healthy (n=12), COVID-19 non-ICU (n=8) and ICU serum (n=26, with or without presence of fucoidan) in no FCS medium for 24 hours. Warm HBSS without  $\text{Ca}^{2+}$  was used to wash the cells once. Thrombin generation curves were obtained by supplementing normal pooled plasma. Thrombin formation was initiated by adding substrate buffer (FluCa-kit, 86197, Thrombinoscope BV, Leiden, The Netherlands) to the plasma. The final reaction volume was 120  $\mu\text{L}$ , of which 80  $\mu\text{L}$  was plasma, 20  $\mu\text{L}$  was HBSS/calibrator and 20  $\mu\text{L}$  was substrate. Thrombin formation was determined every 30 s for 120 min and corrected for the calibrator using Thrombinoscope software.

## Markers of endothelial dysfunction and glycocalyx shedding in cell cultured supernatant

Supernatants collected from experiments mentioned above and stored at -80°C were measured with immunoassays in duplicate according to manufacturer's recommendation. Analytes measured include angiopoietin 2 (Ang-2, DANG20, R&D Systems), soluble thrombomodulin (TM, M850720096, Diaclone), IL-6 (M9316, Sanquin, Amsterdam, The Netherlands) and VWF (A0082, Dako). Samples were diluted 1:100, 1:5, 1:10 and 1:200 respectively in diluent reagent. For angiopoietin 2 and soluble thrombomodulin, commercial control samples were included in each plate to confirm the amount of protein level.

## Public database mining

To further study the role of thrombomodulin in endothelial cells from different vascular beds, datasets from EC atlas ([https://endotheliomics.shinyapps.io/ec\\_atlas/](https://endotheliomics.shinyapps.io/ec_atlas/) [2]) and NCBI Gene expression Omnibus (<https://www.ncbi.nlm.nih.gov/geo/>) were downloaded. We then determined Thbd expression in mice ECs from 11 organs. For human ECs, 2 datasets (GSE43475 [3] and GSE21212 [4]) were downloaded and processed with RMA background correction, log2 transformation and normalization in R. For annotation, we chose the gene with the highest expression as the gene symbol and annotated it via different annotation packages. Then THBD expression was detected in different EC lines.

## References

1. Wang G, Kostidis S, Tiemeier GL, Sol W, de Vries MR, Giera M, Carmeliet P, van den Berg BM, Rabelink TJ. Shear Stress Regulation of Endothelial Glycocalyx Structure Is Determined by Glucobiosynthesis. *Arteriosclerosis, thrombosis, and vascular biology* 2020; 40(2): 350-364.
2. Kalucka J, de Rooij L, Goveia J, Rohlenova K, Dumas SJ, Meta E, Conchinha NV, Taverna F, Teuwen LA, Veys K, Garcia-Caballero M, Khan S, Geldhof V, Sokol L, Chen R, Treps L, Borri M, de Zeeuw P, Dubois C, Karakach TK, Falkenberg KD, Parys M, Yin X, Vinckier S, Du Y, Fenton RA, Schoonjans L, Dewerchin M, Eelen G, Thienpont B, Lin L, Bolund L, Li X, Luo Y, Carmeliet P. Single-Cell Transcriptome Atlas of Murine Endothelial Cells. *Cell* 2020; 180(4): 764-779 e720.
3. Aranguren XL, Agirre X, Beerens M, Coppiello G, Uriz M, Vandersmissen I, Benkheil M, Panadero J, Aguado N, Pascual-Montano A, Segura V, Prosper F, Luttun A. Unraveling a novel transcription factor code determining the human arterial-specific endothelial cell signature. *Blood* 2013; 122(24): 3982-3992.
4. Bhasin M, Yuan L, Keskin DB, Otu HH, Libermann TA, Oettgen P. Bioinformatic identification and characterization of human endothelial cell-restricted genes. *BMC Genomics* 2010; 11: 342.

**Supplementary table S1 Demographic, clinical, and outcome data of patients in BEAT-COVID cohort**

|                                                    | Hospitalized<br>(n = 32) | ICU<br>(n =26)     | Non-ICU<br>(n = 6) | Healthy control<br>(n = 12) |
|----------------------------------------------------|--------------------------|--------------------|--------------------|-----------------------------|
| Age - years median (IQR)                           | 61 (57-70)               | 62 (58-71)         | 56 (47-65)         | 60 (60-60)                  |
| Male sex - n (%)                                   | 26 (81)                  | 21 (81)            | 5 (83)             | 8 (75)                      |
| BMI - kg/m2 median (IQR)                           | 28 (24-30)               | 29 (26-30)         | 25 (20-32)         | -                           |
| Admission Glasgow Coma Score - points median (IQR) | 3 (3-15)                 | 3 (3-15)           | 15 (15-15)         | -                           |
| Days since hospital admission - median (IQR)       | 36 (14-47)               | 43 (22-52)         | 7 (5-11)           | -                           |
| Days in ICU - median (IQR)                         | 31 (19-43)               | 31 (19-43)         | -                  | -                           |
| In-hospital mortality - n (%)                      | 7 (21.9)                 | 7 (26.9)           | 0 (0)              | -                           |
| Glasgow Coma Score - points median (IQR)           | 3 (3-11.8)               | 3 (3-5.8)          | 15 (15-15)         | -                           |
| SOFA score - median (IQR)                          | 7 (7-11)                 | 7 (7-11)           | -                  | -                           |
| LUMC severity score - median (IQR)                 | 12 (9.8-14)              | 13 (12-14)         | 3 (1.5-3.8)        | -                           |
| <b>Comorbidities</b>                               |                          |                    |                    |                             |
| Chronic cardiac disease - n (%)                    | 7 (21.9)                 | 6 (23.1)           | 1 (16.7)           | -                           |
| Hypertension - n (%)                               | 8 (25)                   | 7 (26.9)           | 1 (16.7)           | -                           |
| Chronic pulmonary disease - n (%)                  | 3 (9.4)                  | 3 (11.5)           | 0 (0)              | -                           |
| Asthma - n (%)                                     | 6 (18.8)                 | 6 (23.1)           | 0 (0)              | -                           |
| Chronic kidney disease - n (%)                     | 1 (3.1)                  | 1 (3.9)            | 0 (0)              | -                           |
| Chronic neurological disorder - n (%)              | 3 (9.4)                  | 2 (7.7)            | 1 (16.7)           | -                           |
| Diabetes                                           | 13 (40.6)                | 9 (34.6)           | 4 (66.7)           | -                           |
| Smoking history - n (%)                            | 10 (31.3)                | 10 (38.5)          | 0 (0)              | -                           |
| Thromboembolic event - n (%)                       | 4 (12.5)                 | 4 (15.4)           | 0 (0)              | -                           |
| Coagulopathy - n (%)                               | 1 (3.1)                  | 1 (3.9)            | 0 (0)              | -                           |
| <b>Respiratory function</b>                        |                          |                    |                    |                             |
| Respiratory rate - median (IQR)                    | 26.5 (24-30)             | 28.5 (25-32)       | 20.5 (17-23)       | -                           |
| SpO2 - % median (IQR)                              | 90 (89-92)               | 89.5 (88-90)       | 94.5 (94-96)       | -                           |
| FiO2 - % median (IQR)                              | 60 (41-100)              | 60 (41-100)        | -                  | -                           |
| PaO2/FiO2 ratio - median (IQR)                     | 17 (12.7-20.8)           | 17 (12.7-20.8)     | -                  | -                           |
| Non-invasive ventilation - n (%)                   | 8 (25)                   | 7 (27)             | 1 (17)*            | -                           |
| Invasive ventilation - n (%)                       | 17 (53)                  | 16 (62)            | 1 (17)*            | -                           |
| <b>Coagulation</b>                                 |                          |                    |                    |                             |
| Platelets - 10 <sup>9</sup> /L median (IQR)        | 230 (200-302)            | 2245 (194-309)     | 253 (223-274)      | -                           |
| aPTT - seconds median (IQR)                        | 37.5 (33.6-39.9)         | 37.8 (34.4-40.3)   | 33.5 (31.5-35.5)   | -                           |
| PT - seconds median (IQR)                          | 16.1 (14.8-16.8)         | 15.6 (14.7-16.7)   | 16.65 (16.6-16.7)  | -                           |
| INR - median (IQR)                                 | 1.2 (1.1-1.2)            | 1.2 (1.1-1.2)      | 1.2 (1.2-1.2)      | -                           |
| D-dimer - mg/L median (IQR)                        | 2.24 (1.03-3.96)         | 2.24 (1.03-3.96)   | -                  | -                           |
| <b>Inflammation markers</b>                        |                          |                    |                    |                             |
| CRP - mg/L median (IQR)                            | 164.4 (58.5-245.1)       | 185.5 (55.1-255.5) | 128.8 (76.6-170.9) | -                           |
| Urea - mmol/L median (IQR)                         | 13.4 (5.9-16.8)          | 15.2 (11.5-17.1)   | 5 (4.5-5.2)        | -                           |

\* This patient was first in ICU when treated with non-invasive or invasive ventilation, and stopped ventilation when in non-ICU unit. Blood sampling for this patient was during non-ICU hospitalization.

BMI, body mass index; IQR, interquartile range

**Supplementary table S2 Primer sequences**

---

| <b>Gene</b> | <b>Forward sequence</b> | <b>Reverse sequence</b> |
|-------------|-------------------------|-------------------------|
| GAPDH       | CCTGCACCACCAACTGCTTA    | GGCCATCCACAGTCTTCTGAG   |
| HPSE        | TCCTGCGTACCTGAGGTTTG    | CCATTCCAACCGTAACTTCTCCT |
| SDC1        | CCACCATGAGACCTCAACCC    | GCCACTACAGCCGTATTCTCC   |
| ICAM1       | GTATGAACTGAGCAATGTGCAAG | GTTCCACCCGTTCTGGAGTC    |
| ANGPT2      | CTCGAATACGATGACTCGGTG   | TCATTAGCCACTGAGTGTTGTTT |
| IL6         | GGTACATCCTCGACGGCATCT   | GTGCCTCTTTGCTGCTTTCAC   |
| F3 (TF)     | CCCAAACCCGTCAATCAAGTC   | CCAAGTACGTCTGCTTCACAT   |

---



## Supplementary figures

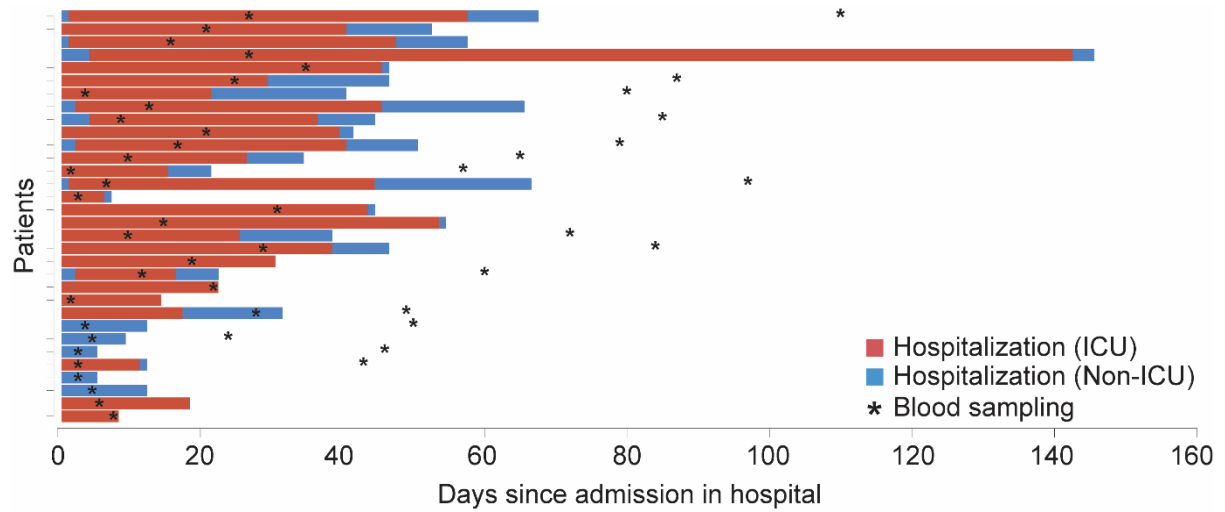

**Supplementary figure S1 Patient's hospitalization timelines and blood sampling dates.** For each included patient, hospitalization on non-ICU (blue bar), and on ICU (red bar) are indicated, aligned to the day of admission. \* represent blood sampling date. For some of the patients, blood samples were collected during the whole hospitalization (ICU and non-ICU) and recovery state (discharge after 6 weeks).

a)

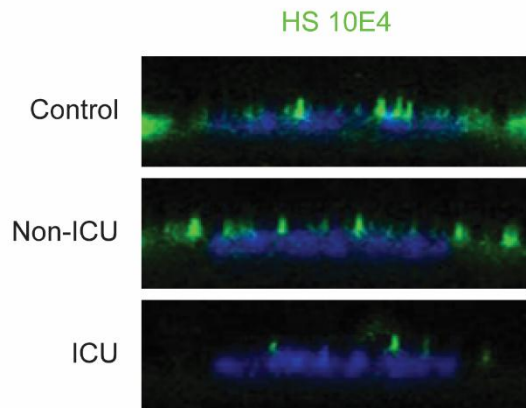

b)

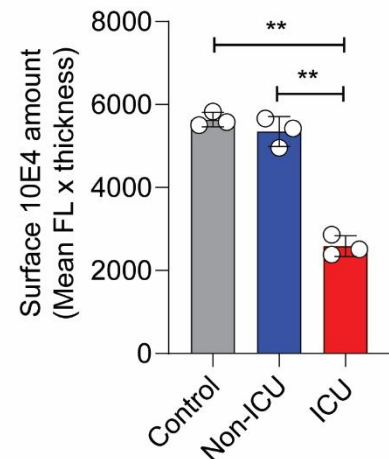

**Supplementary figure S2 Loss of heparan sulfate in primary human pulmonary microvascular endothelial cells in presence of COVID-19 ICU serum.** a) Representative confocal images of anti-heparan sulfate (HS, 10E4 clone) staining on the surface of primary human pulmonary microvascular endothelial cells (HPMECs) in the presence of 10% pooled- healthy control (n = 12), COVID-19 non-ICU (n = 8) and COVID-19 ICU (n = 26) serum for 24hrs. b) Quantification of HPMECs surface HS (10E4 clone) in the presence of 10% pooled- healthy control, COVID-19 non-ICU and COVID-19 ICU serum for 24hrs, presented as mean fluorescence times thickness of 3 independent experiments. Graphs represent the mean  $\pm$  SD. One-way ANOVA followed by Tukey's multiple comparisons test were performed; \*\*p<0.01

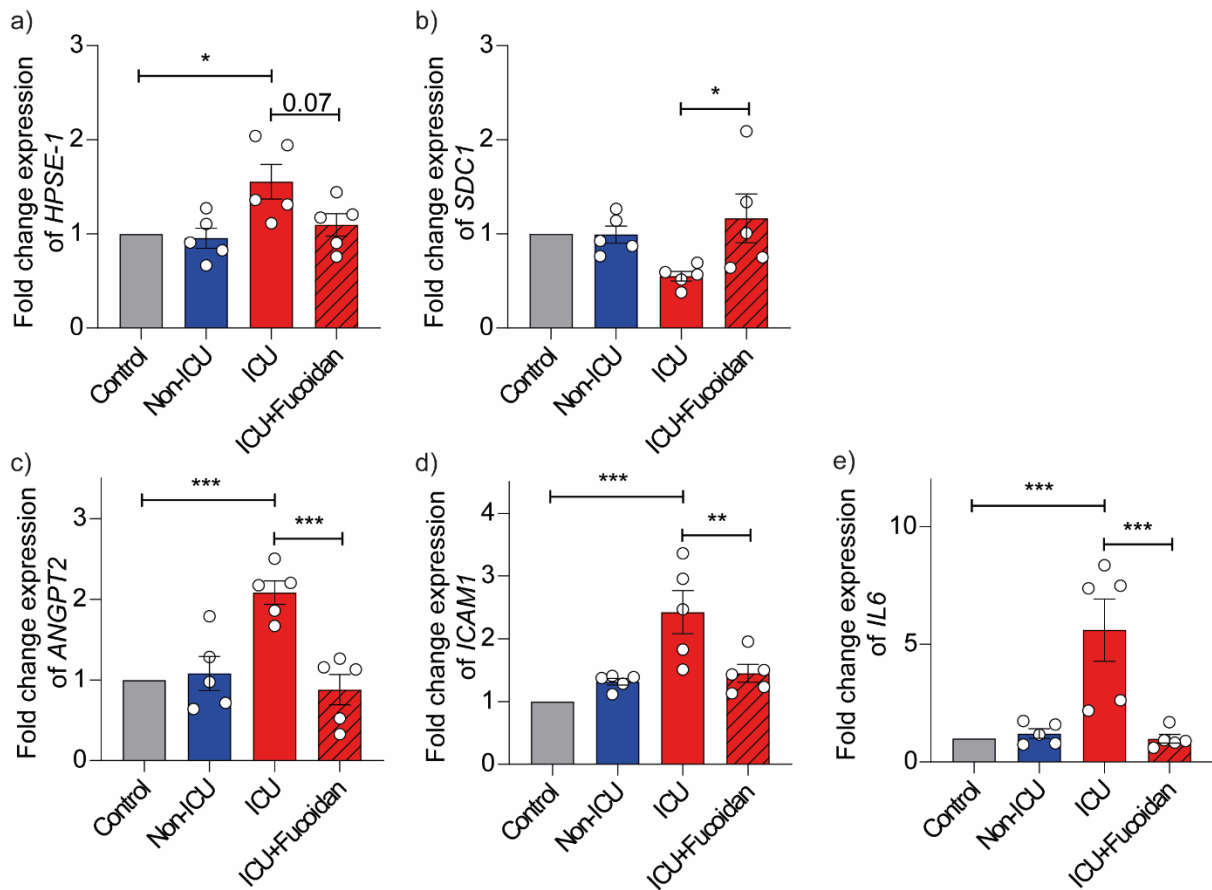

**Supplementary figure S3 Fucoidan reduces mRNA expression of endothelial activation related**

**markers.** Gene expression data a) heparanase (*HPSE-1*), b) syndecan-1 (*SDC1*), c) angiopoietin 2 (*ANGPT2*) and e) *IL6* expression in response to 10% pooled- healthy control (n = 12), COVID-19 non-ICU (n = 8) and COVID-19 ICU (n = 26) serum with and without fucoidan (10 µg/mL) for 24hrs, presented as fold change expression normalized to healthy control of 5 independent experiments. Graphs represent the mean ± SEM. One-way ANOVA followed by Tukey's multiple comparisons test were performed; \*p<0.05, \*\*p<0.01, \*\*\*p<0.001

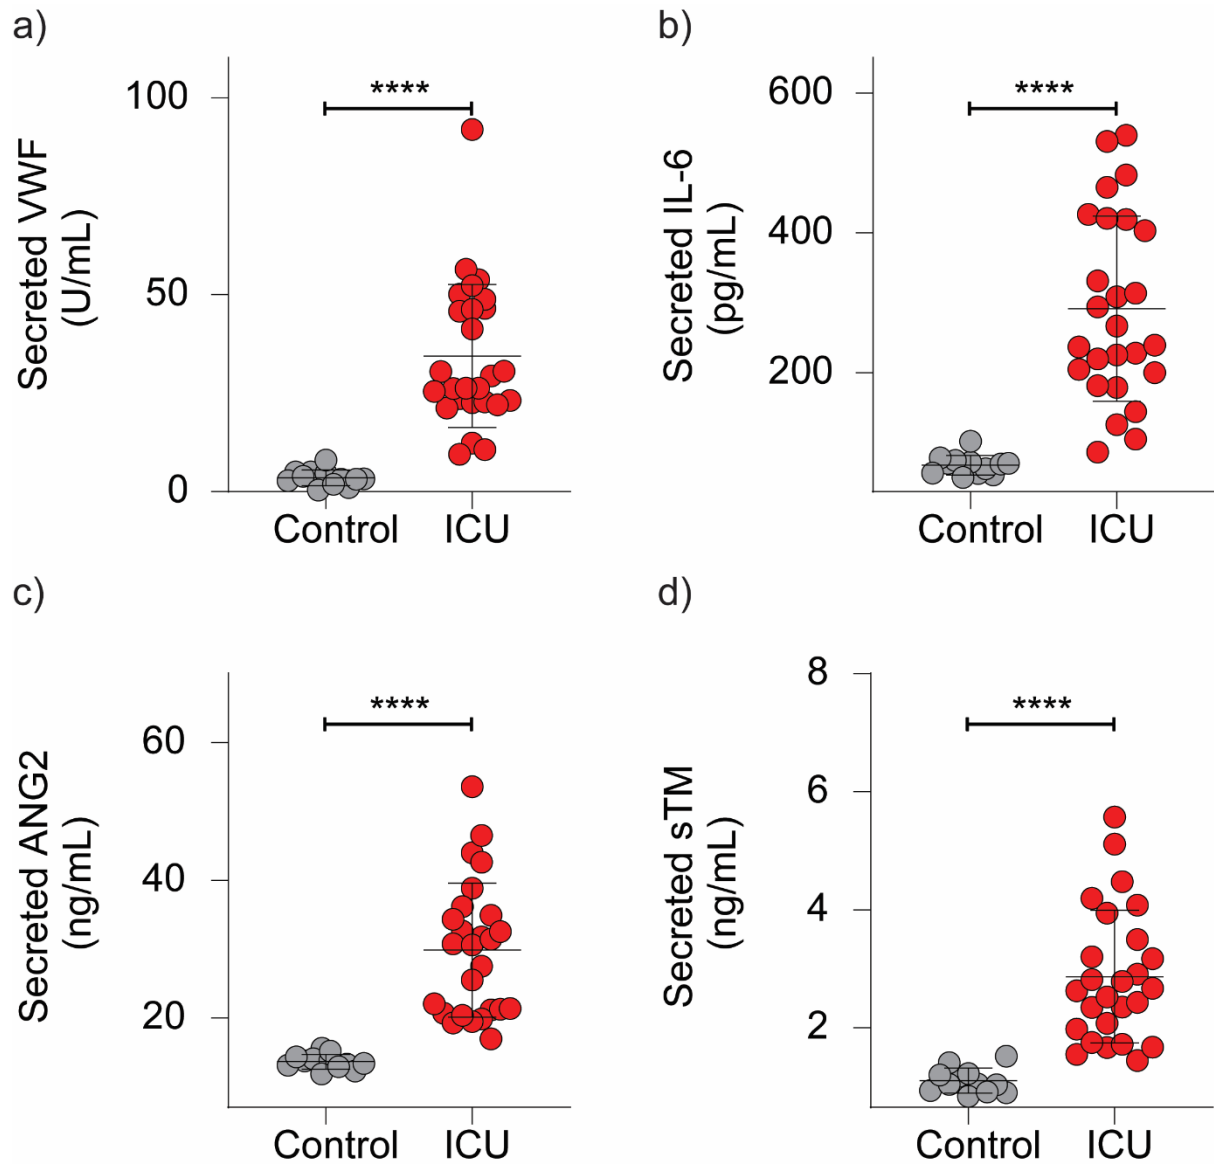

**Supplementary figure S4 Comparison of endothelial dysfunction and glycocalyx shedding related markers in cell culture supernatants.** Levels of a) secreted von Willebrand factor (VWF), b) secreted IL6, c) secreted angiopoietin 2 (ANG2) and d) secreted soluble thrombomodulin (sTM) in cell culture supernatants of primary human pulmonary microvascular endothelial cells (HPMECS) in the presence of serum of healthy controls (grey, n = 12) and COVID-19 ICU patients (red, n = 26). Nonpaired two-tailed Student t test were performed; \*p<0.05, \*\*p<0.01, \*\*\*p<0.001, \*\*\*\*p<0.0001.

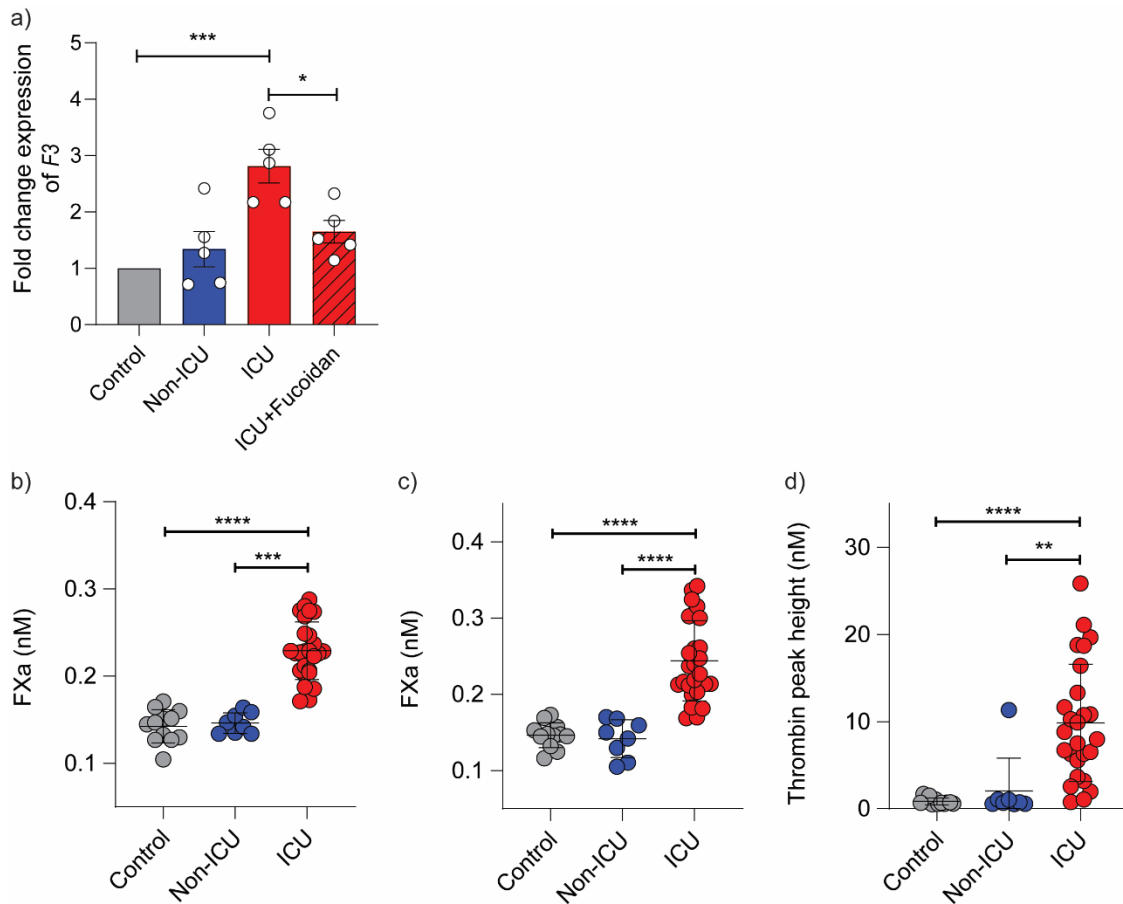

**Supplementary figure S5 Serum mediators of COVID-19 patients on ICU promote activation of coagulation on endothelial cells.** a) Gene expression of F3 (tissue factor) in response to 10% pooled healthy control (n = 12), COVID-19 non-ICU (n = 8) and COVID-19 ICU (n = 26) serum with and without fucoidan (10  $\mu\text{g}/\text{mL}$ ) for 24hrs, presented as fold change expression normalized to healthy control of 5 independent experiments. Factor X a (FXa) production (nM) in b) first hour and c) second hour on HPMECs surface in the presence of 10% individual healthy control (n=12), COVID-19 non-ICU (n=8) and COVID-19 ICU (n=26) serum for 24hrs . d) Thrombin generation peak height (nM) measured on HPMECs surface in the presence of 10% individual healthy control (n=12), COVID-19 non-ICU (n=8) and COVID-19 ICU (n=26) serum for 24hrs . One-way ANOVA followed by Tukey's multiple comparisons test were performed; \* $p < 0.05$ , \*\* $p < 0.01$ , \*\*\* $p < 0.001$ , \*\*\*\* $p < 0.0001$ .

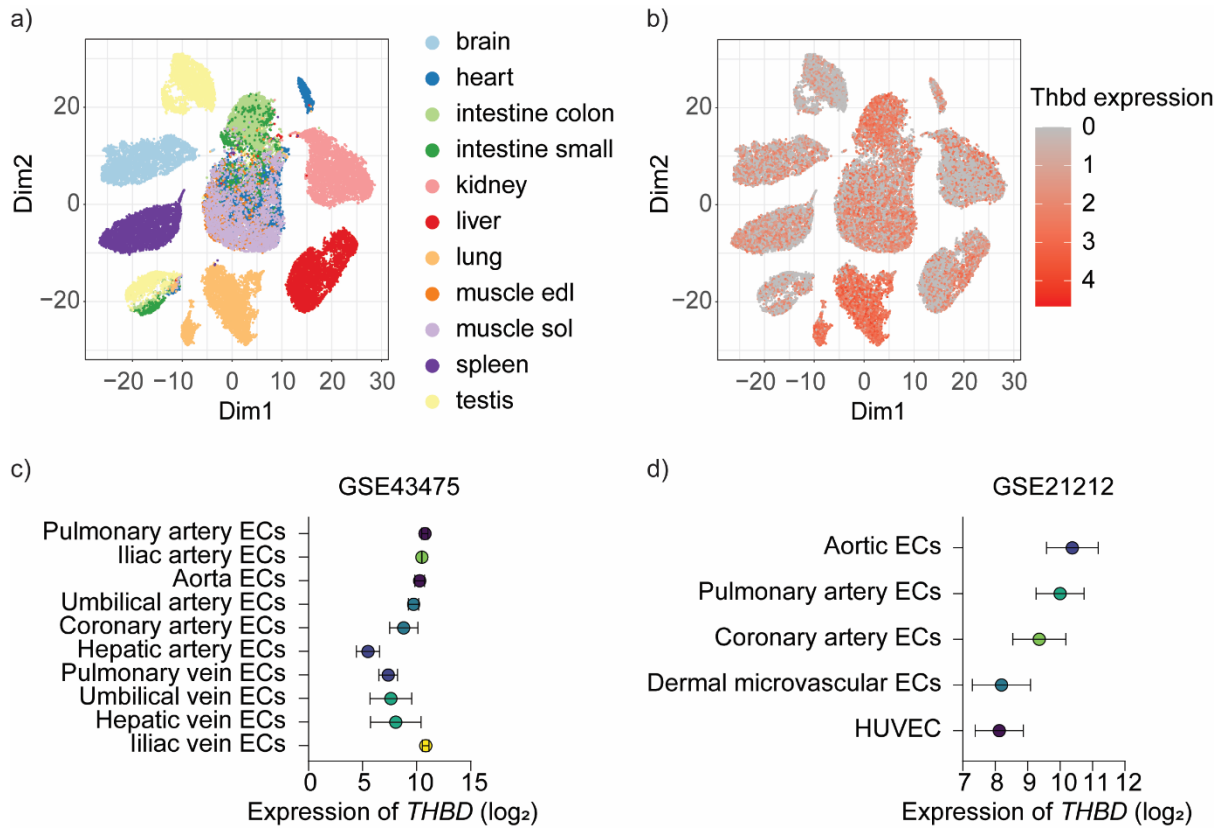

**Supplementary figure S6 Thrombomodulin expression levels in different vascular beds.** a) tSNE plot revealing gene variation in 11 types of endothelial cells from mice based on EC atlas ([https://endotheliomics.shinyapps.io/ec\\_atlas/](https://endotheliomics.shinyapps.io/ec_atlas/)). b) Thrombomodulin (*Thbd*) gene expression in 11 types of endothelial cells from mice. *THBD* expression from different human vascular beds based on databases c) GSE43475 and d) GSE21212.
